# Supplementary figures and images for: Molecular Determinants of Filament Capping Proteins Required for the Formation of Functional Flagella in Gram-Negative Bacteria
Source: MDPI journal article supplement (doi:10.3390/biom11101397), 2021-09-22

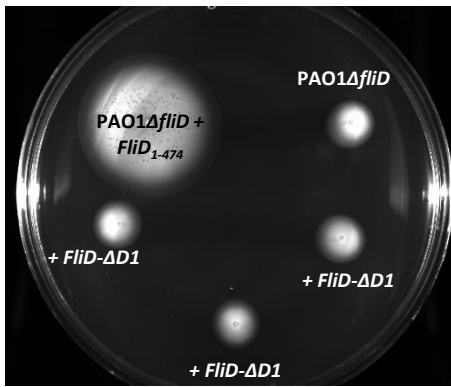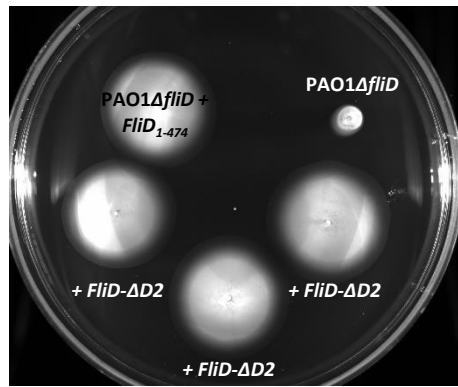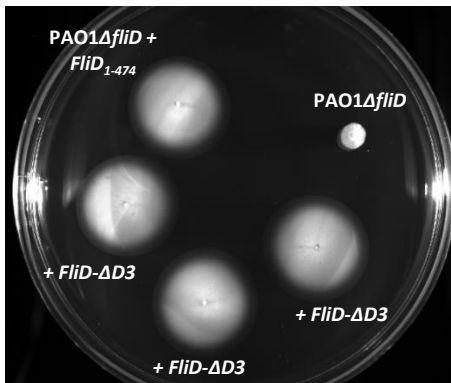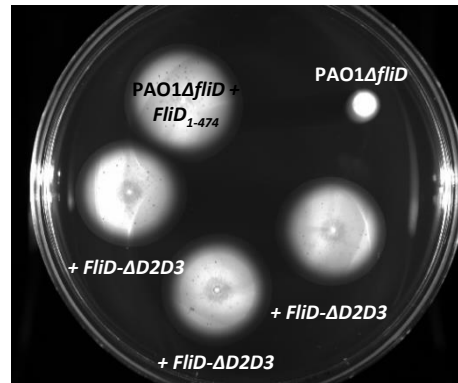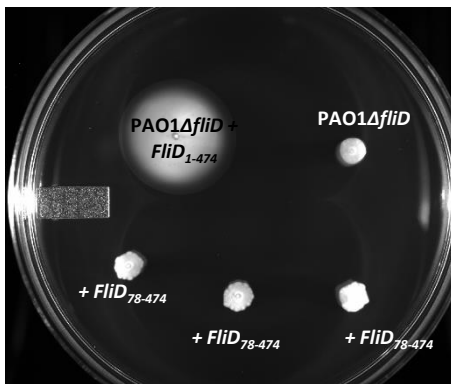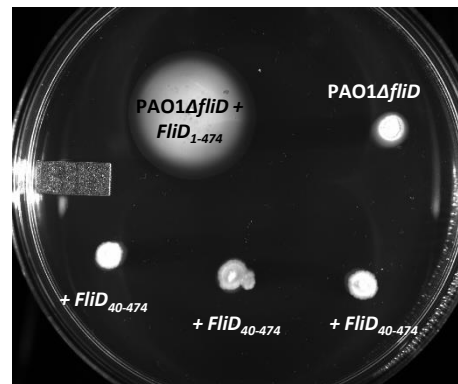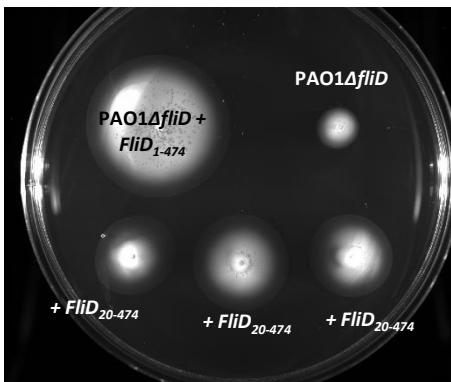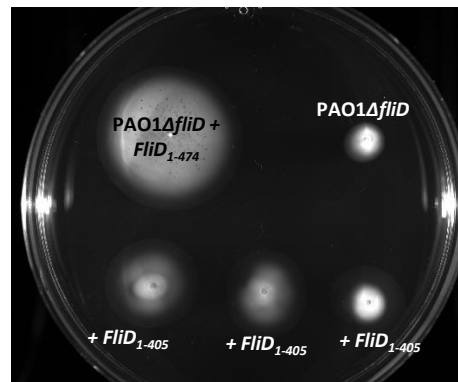

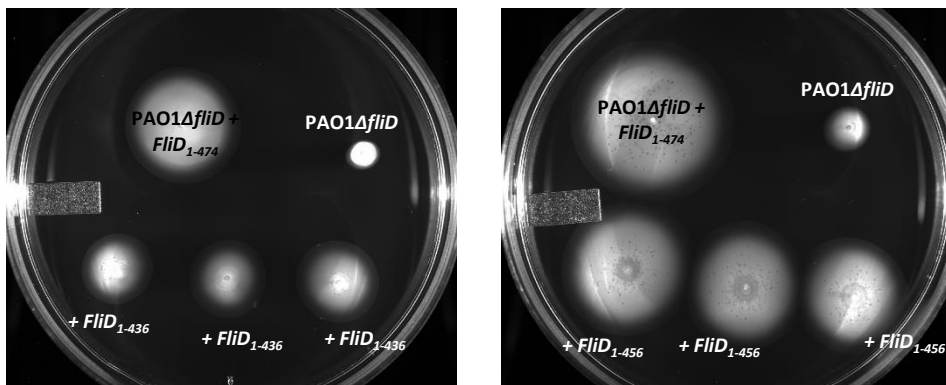

**Fig. S4**

Supplement: s1 [file s1]

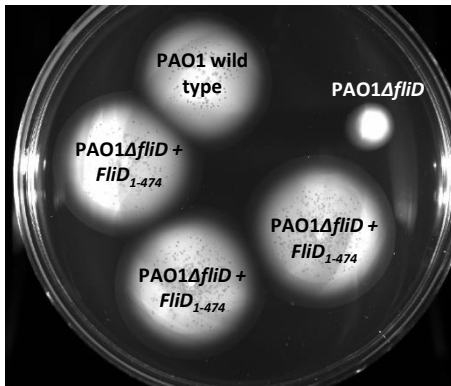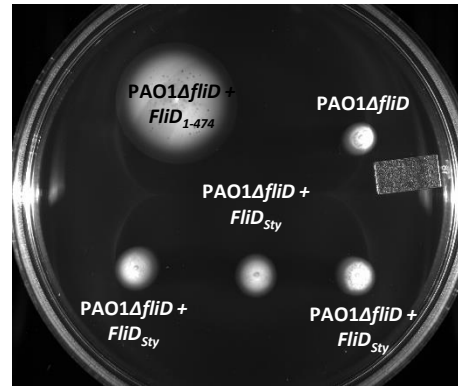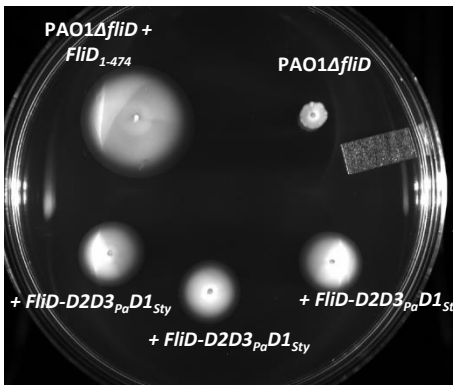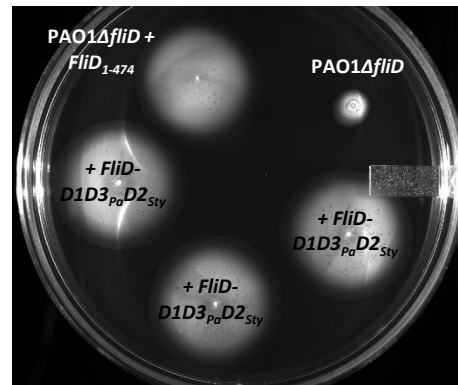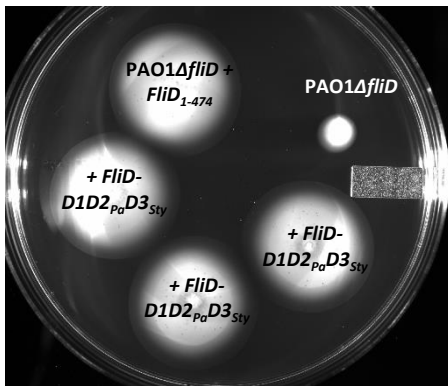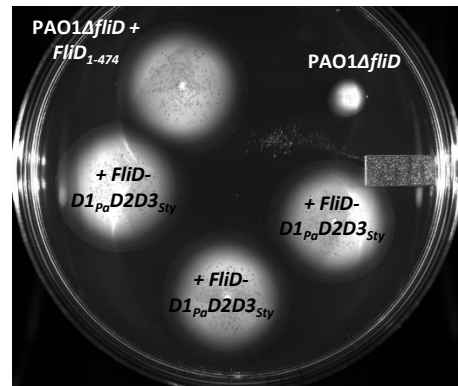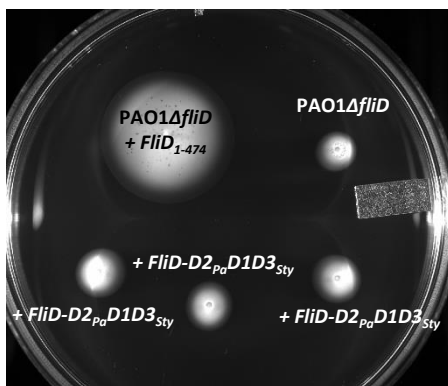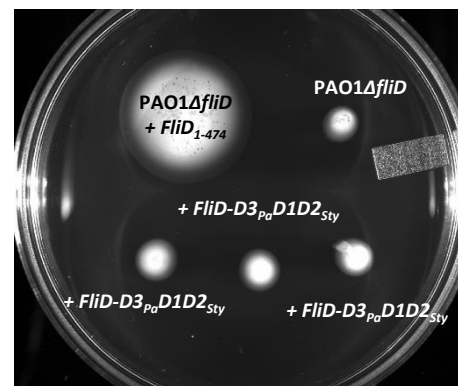

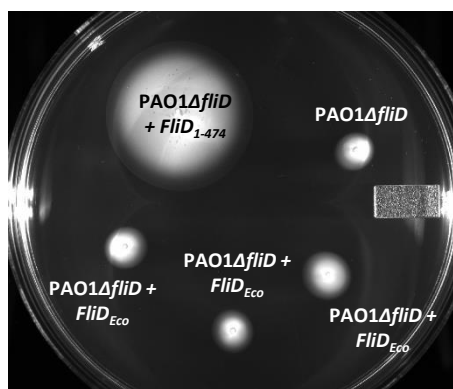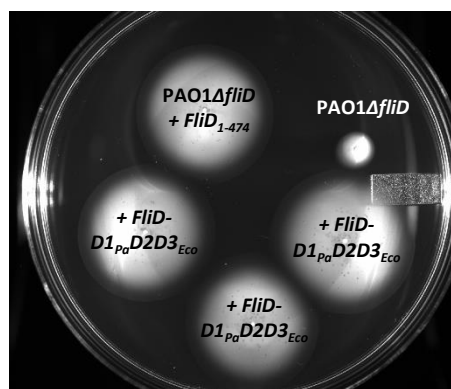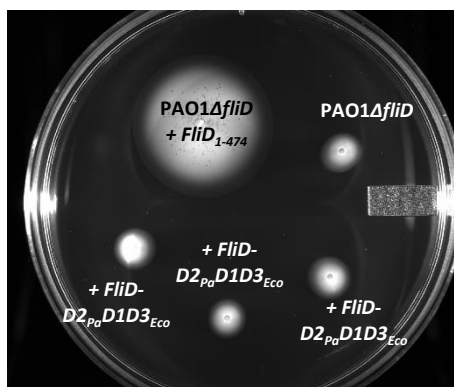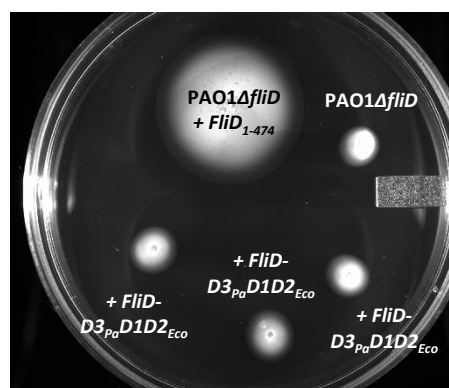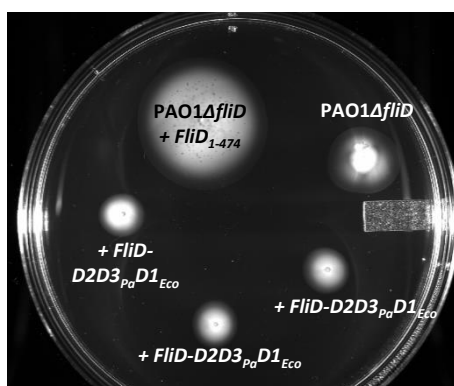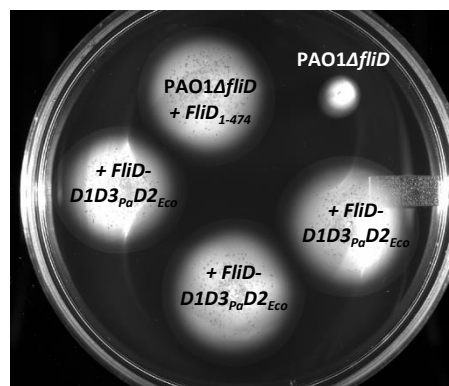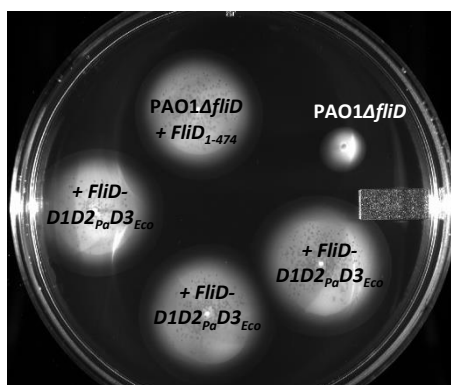

Fig. S2

Supplement: s1 [file s1]

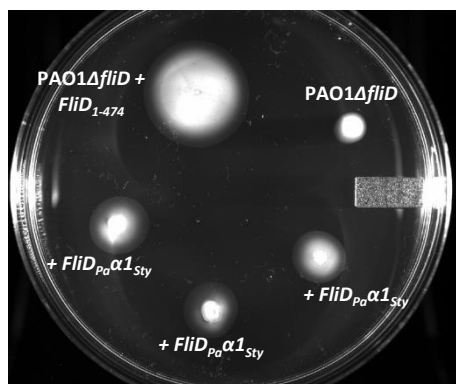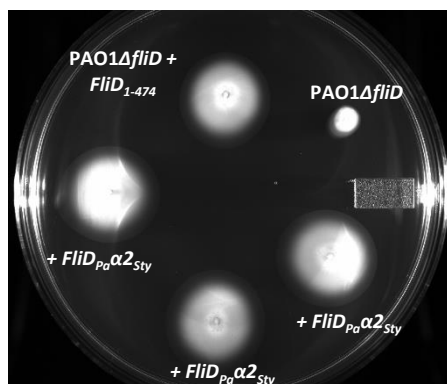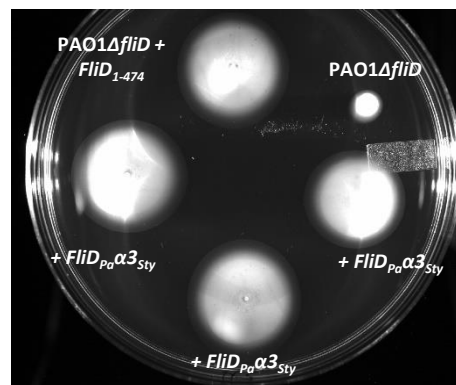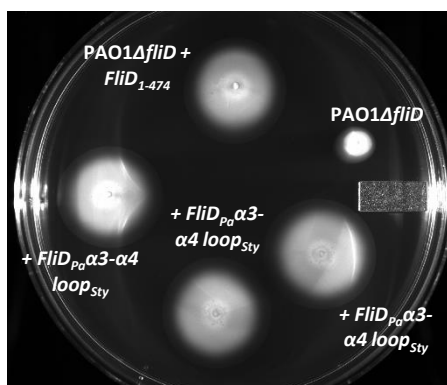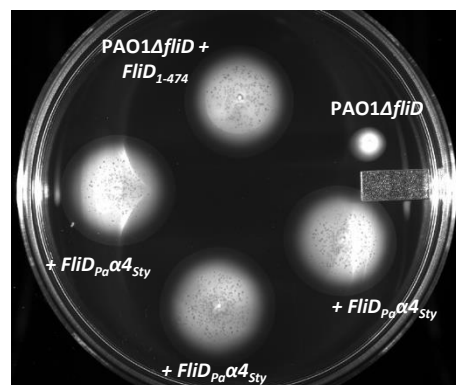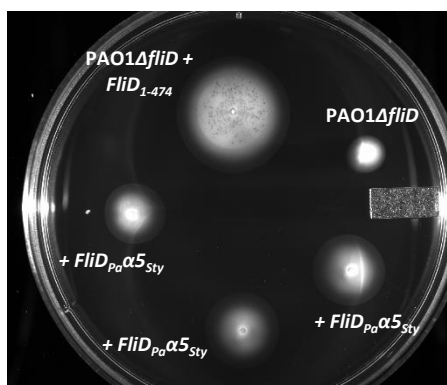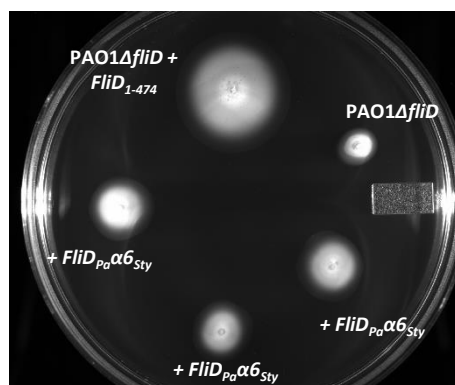

**Fig. S3**

Supplement: s1 [file s1]

pH 7.0

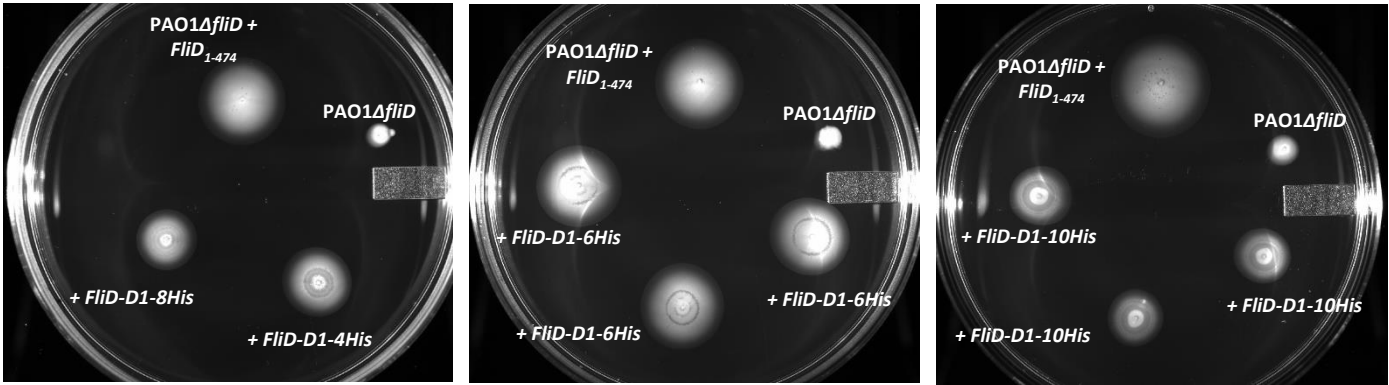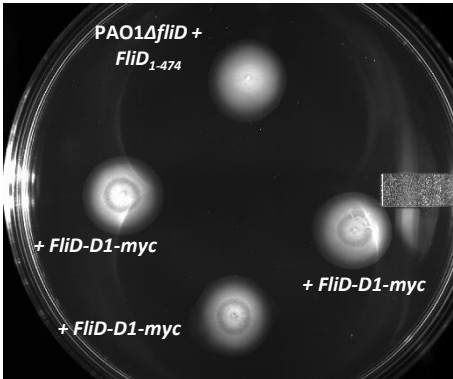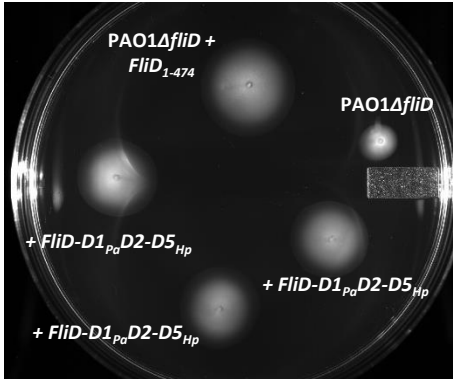

pH 5.8

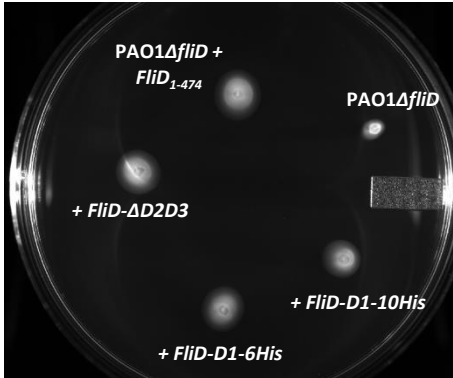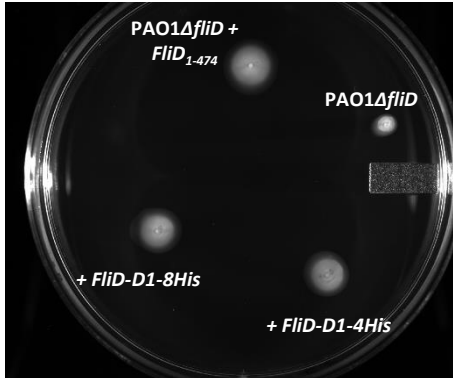

pH 6.2

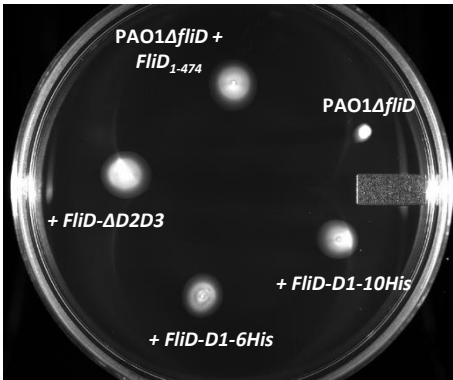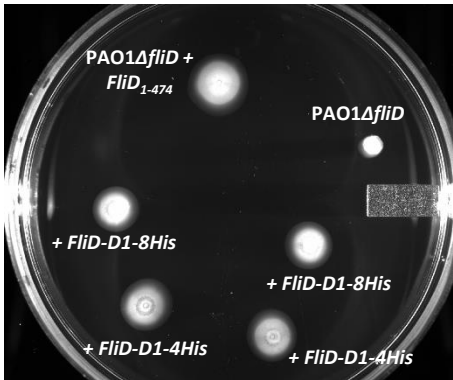

pH 6.6

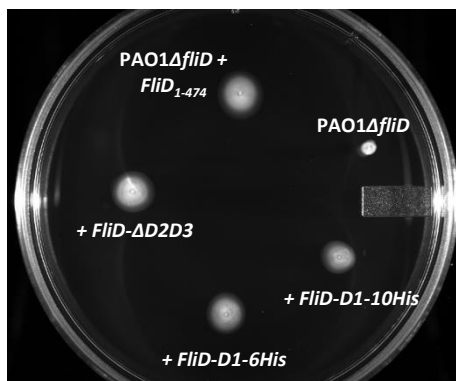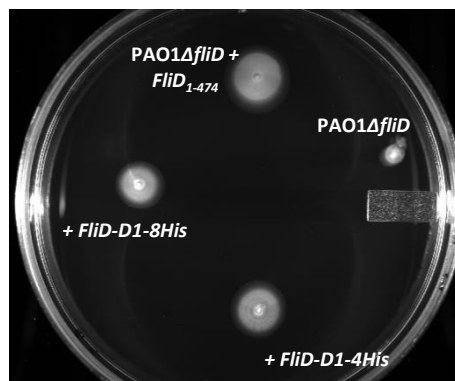

pH 7.4

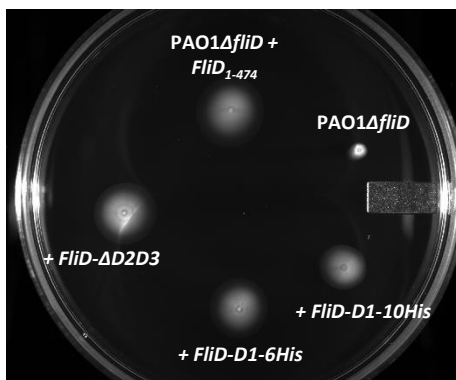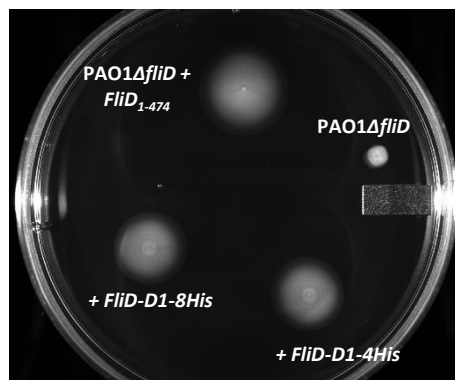

pH 7.8

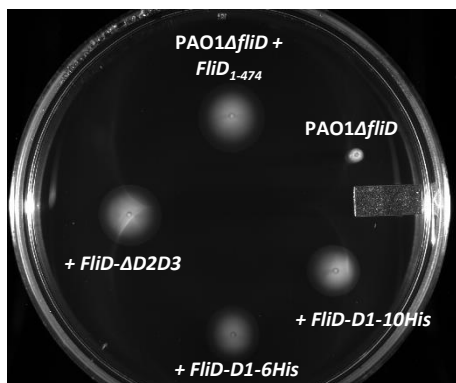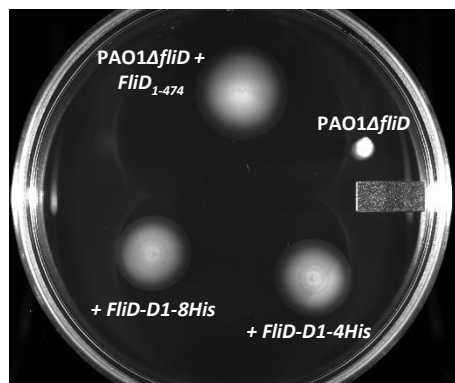

pH 8.2

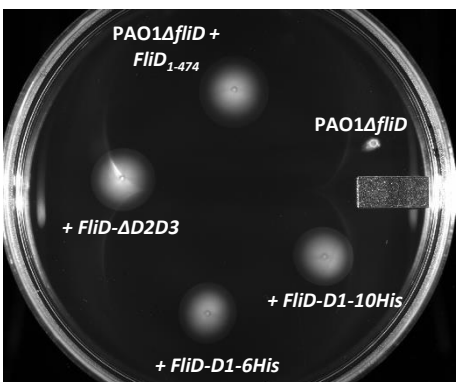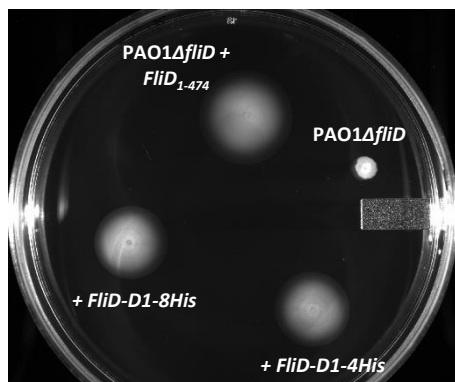

Fig. S5

Supplement: s1 [file s1]
